# Supplementary material for: Transcriptome Profile of a New Mouse Model of Spinocerebellar Ataxia Type 14 Implies Changes in Cerebellar Development
Source: MDPI journal article supplement (doi:10.3390/genes13081417), 2022-08-09
Supplement: s1 [file s1]

## Supplementary Tables

**Supplementary Table S1.** The genes significantly up- or downregulated in Het PKC $\gamma$ -A24E mice. Bold highlighted genes are differentially expressed in both Homo and Hetero PKC $\gamma$ -A24E mice.

| Genes           | log2FC  | p-value  | FDR     | Regulation |
|-----------------|---------|----------|---------|------------|
| <b>Stk17b</b>   | 0.3006  | 3.81E-05 | 0.04781 | UP         |
| Mrfap1          | 0.2246  | 5.13E-05 | 0.04781 | UP         |
| <b>Wdfy3</b>    | -0.2266 | 3.11E-05 | 0.04781 | DOWN       |
| <b>Ranbp2</b>   | -0.2276 | 3.57E-05 | 0.04781 | DOWN       |
| <b>Bdp1</b>     | -0.2777 | 4.90E-06 | 0.03873 | DOWN       |
| <b>Prex2</b>    | -0.2839 | 4.85E-05 | 0.04781 | DOWN       |
| <b>Kcna1</b>    | -0.304  | 8.91E-06 | 0.03873 | DOWN       |
| <b>Fam126b</b>  | -0.3262 | 2.61E-05 | 0.04781 | DOWN       |
| <b>Zbed6</b>    | -0.349  | 1.32E-05 | 0.03873 | DOWN       |
| <b>Hipk2</b>    | -0.351  | 3.80E-05 | 0.04781 | DOWN       |
| <b>Cpeb3</b>    | -0.3512 | 3.25E-06 | 0.03873 | DOWN       |
| <b>Stxbp5l</b>  | -0.4039 | 1.75E-05 | 0.03991 | DOWN       |
| <b>Dgkg</b>     | -0.4091 | 5.11E-05 | 0.04781 | DOWN       |
| <b>Ntng1</b>    | -0.4608 | 4.47E-05 | 0.04781 | DOWN       |
| <b>Ncam2</b>    | -0.5396 | 5.13E-05 | 0.04781 | DOWN       |
| <b>Mid1-ps1</b> | -2.6683 | 1.04E-05 | 0.03873 | DOWN       |

**Supplementary Table S2.** The genes significantly up- or downregulated in Homo PKC $\gamma$ -A24E mice. Bold highlighted genes are differentially expressed in both Homo and Hetero PKC $\gamma$ -A24E mice.

| Genes      | log2FC | P.Value  | FDR     | Regulation |
|------------|--------|----------|---------|------------|
| Psrc1      | 1.1505 | 1.75E-04 | 0.04000 | UP         |
| Mfap4      | 0.9363 | 3.81E-04 | 0.04689 | UP         |
| Anapc15-ps | 0.7787 | 4.11E-04 | 0.04715 | UP         |
| Pcsk9      | 0.7576 | 2.31E-04 | 0.04563 | UP         |
| Igfbpl1    | 0.7405 | 4.17E-04 | 0.04744 | UP         |
| Igsf9      | 0.7026 | 3.31E-04 | 0.04640 | UP         |
| Ptch2      | 0.6584 | 2.37E-05 | 0.02360 | UP         |
| Eln        | 0.4881 | 4.04E-06 | 0.01884 | UP         |
| Nfatc4     | 0.4807 | 1.59E-04 | 0.03986 | UP         |
| Serinc2    | 0.4542 | 1.80E-05 | 0.02360 | UP         |
| Plcd1      | 0.3695 | 1.28E-04 | 0.03921 | UP         |
| Nadsyn1    | 0.3471 | 5.06E-04 | 0.04876 | UP         |
| Tmem265    | 0.3341 | 4.73E-04 | 0.04744 | UP         |
| Slc1a6     | 0.3273 | 2.55E-04 | 0.04640 | UP         |
| Dynlt1f    | 0.3252 | 2.95E-04 | 0.04640 | UP         |
| Lhpp       | 0.3181 | 1.49E-04 | 0.03986 | UP         |
| Cirbp      | 0.3160 | 8.06E-05 | 0.03612 | UP         |
| Mir9-3hg   | 0.2947 | 3.78E-04 | 0.04689 | UP         |

|               |         |          |         |      |
|---------------|---------|----------|---------|------|
| Tarbp2        | 0.2883  | 2.02E-05 | 0.02360 | UP   |
| Pde9a         | 0.2850  | 2.42E-04 | 0.04638 | UP   |
| Otx2          | 0.2796  | 1.06E-04 | 0.03818 | UP   |
| Sema6c        | 0.2733  | 2.75E-04 | 0.04640 | UP   |
| Phf5a         | 0.2630  | 3.00E-04 | 0.04640 | UP   |
| Cog7          | 0.2613  | 3.97E-04 | 0.04689 | UP   |
| Mab21l1       | 0.2595  | 8.44E-05 | 0.03612 | UP   |
| Spag5         | 0.2580  | 3.63E-04 | 0.04689 | UP   |
| Plscr3        | 0.2560  | 1.24E-04 | 0.03852 | UP   |
| <b>Stk17b</b> | 0.2547  | 1.21E-04 | 0.03852 | UP   |
| Tmsb4x        | 0.2419  | 3.94E-04 | 0.04689 | UP   |
| Maf1          | 0.2379  | 5.51E-05 | 0.03612 | UP   |
| Ncapd2        | 0.2339  | 5.37E-04 | 0.04942 | UP   |
| Zbtb18        | 0.2325  | 2.64E-04 | 0.04640 | UP   |
| Id2           | 0.2318  | 3.00E-05 | 0.02711 | UP   |
| Wbp1          | 0.2226  | 1.34E-04 | 0.03934 | UP   |
| Paxx          | 0.2163  | 3.98E-04 | 0.04689 | UP   |
| Nfia          | 0.2161  | 4.11E-04 | 0.04715 | UP   |
| Rps27rt       | 0.2121  | 3.68E-04 | 0.04689 | UP   |
| Tab1          | 0.2112  | 1.08E-04 | 0.03818 | UP   |
| Rpl32         | 0.2028  | 3.24E-04 | 0.04640 | UP   |
| Smardc2       | 0.2008  | 3.36E-04 | 0.04640 | UP   |
| Commd3        | 0.1969  | 4.36E-04 | 0.04744 | UP   |
| Tspan4        | 0.1947  | 4.64E-04 | 0.04744 | UP   |
| Tpt1-ps3      | 0.1890  | 2.58E-04 | 0.04640 | UP   |
| Morc2a        | 0.1704  | 4.45E-04 | 0.04744 | UP   |
| Gdpd1         | 0.1674  | 5.19E-04 | 0.04930 | UP   |
| Ids           | -0.1477 | 4.39E-04 | 0.04744 | DOWN |
| Synj1         | -0.1603 | 4.03E-04 | 0.04715 | DOWN |
| Tspan4        | -0.1608 | 1.90E-04 | 0.04177 | DOWN |
| Hipk3         | -0.1641 | 3.68E-04 | 0.04689 | DOWN |
| <b>Wdfy3</b>  | -0.1694 | 3.01E-04 | 0.04640 | DOWN |
| Sos1          | -0.1746 | 3.46E-04 | 0.04651 | DOWN |
| Cltc          | -0.1784 | 1.62E-04 | 0.03986 | DOWN |
| <b>Bdp1</b>   | -0.1785 | 2.67E-04 | 0.04640 | DOWN |
| Pcm1          | -0.1792 | 1.98E-04 | 0.04221 | DOWN |
| Kif21a        | -0.1814 | 4.44E-04 | 0.04744 | DOWN |
| Ptprz1        | -0.1823 | 4.80E-04 | 0.04758 | DOWN |
| Wnk1          | -0.1825 | 2.28E-04 | 0.04536 | DOWN |
| Npc1          | -0.1839 | 3.34E-04 | 0.04640 | DOWN |
| Utrn          | -0.1866 | 7.49E-05 | 0.03612 | DOWN |
| Gprasp1       | -0.1868 | 4.48E-04 | 0.04744 | DOWN |
| Zcchc18       | -0.1881 | 5.47E-04 | 0.04985 | DOWN |
| Adgrl3        | -0.1945 | 1.58E-04 | 0.03986 | DOWN |
| <b>Ranbp2</b> | -0.1954 | 8.47E-05 | 0.03612 | DOWN |
| Raph1         | -0.1999 | 1.38E-04 | 0.03986 | DOWN |

|                |         |          |         |      |
|----------------|---------|----------|---------|------|
| Fam120c        | -0.2009 | 5.46E-04 | 0.04985 | DOWN |
| Tmod2          | -0.2034 | 3.42E-04 | 0.04651 | DOWN |
| Heatr5a        | -0.2070 | 3.23E-04 | 0.04640 | DOWN |
| Strn           | -0.2078 | 1.14E-04 | 0.03818 | DOWN |
| Sacm1l         | -0.2111 | 3.86E-04 | 0.04689 | DOWN |
| Sparcl1        | -0.2135 | 3.97E-04 | 0.04689 | DOWN |
| Secisbp2l      | -0.2136 | 6.61E-05 | 0.03612 | DOWN |
| Fgfr3          | -0.2164 | 2.63E-04 | 0.04640 | DOWN |
| Dlc1           | -0.2167 | 2.88E-04 | 0.04640 | DOWN |
| Pdpr           | -0.2171 | 3.76E-04 | 0.04689 | DOWN |
| Slco3a1        | -0.2176 | 3.27E-04 | 0.04640 | DOWN |
| Usp31          | -0.2187 | 1.58E-04 | 0.03986 | DOWN |
| Cbl            | -0.2194 | 2.33E-05 | 0.02360 | DOWN |
| Ret            | -0.2195 | 4.10E-04 | 0.04715 | DOWN |
| Phyhipl        | -0.2217 | 2.19E-04 | 0.04401 | DOWN |
| Rragd          | -0.2273 | 4.35E-04 | 0.04744 | DOWN |
| Qk             | -0.2280 | 1.63E-04 | 0.03986 | DOWN |
| Kcnq2          | -0.2297 | 3.00E-04 | 0.04640 | DOWN |
| Pptc7          | -0.2317 | 3.48E-04 | 0.04651 | DOWN |
| Mob3b          | -0.2325 | 5.11E-04 | 0.04876 | DOWN |
| Cpeb2          | -0.2376 | 9.72E-05 | 0.03787 | DOWN |
| Prepl          | -0.2377 | 2.12E-04 | 0.04335 | DOWN |
| Zeb2           | -0.2385 | 4.70E-04 | 0.04744 | DOWN |
| Slc1a1         | -0.2391 | 4.65E-04 | 0.04744 | DOWN |
| Mdn1           | -0.2402 | 1.46E-04 | 0.03986 | DOWN |
| Fam13c         | -0.2409 | 9.24E-05 | 0.03716 | DOWN |
| Pdxk           | -0.2446 | 2.09E-05 | 0.02360 | DOWN |
| Tmem56         | -0.2454 | 8.84E-06 | 0.02360 | DOWN |
| Cntnap2        | -0.2510 | 2.39E-04 | 0.04633 | DOWN |
| <b>Hipk2</b>   | -0.2579 | 4.37E-04 | 0.04744 | DOWN |
| Lrp1b          | -0.2645 | 2.68E-04 | 0.04640 | DOWN |
| Ets2           | -0.2652 | 1.21E-04 | 0.03852 | DOWN |
| <b>Fam126b</b> | -0.2693 | 9.07E-05 | 0.03716 | DOWN |
| Peg3           | -0.2711 | 6.90E-05 | 0.03612 | DOWN |
| Sash1          | -0.2712 | 4.60E-04 | 0.04744 | DOWN |
| Pcdh9          | -0.2725 | 1.84E-05 | 0.02360 | DOWN |
| Zfp800         | -0.2742 | 3.49E-04 | 0.04651 | DOWN |
| <b>Prex2</b>   | -0.2758 | 3.19E-05 | 0.02711 | DOWN |
| Baalc          | -0.2803 | 4.68E-04 | 0.04744 | DOWN |
| Slc22a23       | -0.2856 | 5.36E-04 | 0.04942 | DOWN |
| Slitrk4        | -0.2891 | 1.67E-04 | 0.03986 | DOWN |
| Atp2b4         | -0.2902 | 2.10E-04 | 0.04335 | DOWN |
| <b>Zbed6</b>   | -0.2917 | 4.71E-05 | 0.03452 | DOWN |
| Ptprrt         | -0.2932 | 3.91E-04 | 0.04689 | DOWN |
| Lpar1          | -0.2965 | 4.38E-04 | 0.04744 | DOWN |
| Ogfod1         | -0.2974 | 2.91E-04 | 0.04640 | DOWN |

|                |         |          |         |      |
|----------------|---------|----------|---------|------|
| Mir5114        | -0.2985 | 4.40E-04 | 0.04744 | DOWN |
| Gad2           | -0.3008 | 3.13E-04 | 0.04640 | DOWN |
| Slc7a14        | -0.3018 | 8.54E-05 | 0.03612 | DOWN |
| <b>Kcna1</b>   | -0.3045 | 4.19E-06 | 0.01884 | DOWN |
| Hexb           | -0.3072 | 4.80E-04 | 0.04758 | DOWN |
| Abhd3          | -0.3089 | 1.96E-04 | 0.04221 | DOWN |
| Slc24a2        | -0.3156 | 7.41E-05 | 0.03612 | DOWN |
| Cpox           | -0.3170 | 1.05E-04 | 0.03818 | DOWN |
| <b>Dgkg</b>    | -0.3209 | 3.19E-04 | 0.04640 | DOWN |
| <b>Stxbp5l</b> | -0.3210 | 9.97E-05 | 0.03787 | DOWN |
| Gabrb2         | -0.3242 | 3.14E-04 | 0.04640 | DOWN |
| <b>Cpeb3</b>   | -0.3267 | 3.71E-06 | 0.01884 | DOWN |
| Prkg1          | -0.3269 | 3.70E-04 | 0.04689 | DOWN |
| Slc1a2         | -0.3273 | 3.04E-05 | 0.02711 | DOWN |
| Bcas1          | -0.3333 | 4.49E-04 | 0.04744 | DOWN |
| Asap1          | -0.3335 | 3.08E-04 | 0.04640 | DOWN |
| Ptpn2          | -0.3340 | 8.10E-05 | 0.03612 | DOWN |
| Edil3          | -0.3344 | 2.87E-04 | 0.04640 | DOWN |
| Tspan2         | -0.3384 | 2.74E-04 | 0.04640 | DOWN |
| Plxnb3         | -0.3447 | 4.45E-04 | 0.04744 | DOWN |
| Zc3h12c        | -0.3455 | 5.30E-04 | 0.04938 | DOWN |
| Dock10         | -0.3516 | 3.30E-05 | 0.02711 | DOWN |
| Nipa1          | -0.3553 | 3.72E-04 | 0.04689 | DOWN |
| Car2           | -0.3574 | 1.66E-04 | 0.03986 | DOWN |
| Itgb8          | -0.3599 | 1.15E-04 | 0.03818 | DOWN |
| Dzank1         | -0.3682 | 2.71E-04 | 0.04640 | DOWN |
| Alcam          | -0.3715 | 2.51E-04 | 0.04640 | DOWN |
| Cdh20          | -0.3822 | 1.02E-04 | 0.03808 | DOWN |
| Rtkn           | -0.3873 | 2.88E-04 | 0.04640 | DOWN |
| Tppp           | -0.3875 | 1.07E-05 | 0.02360 | DOWN |
| Sema5a         | -0.3891 | 8.21E-06 | 0.02360 | DOWN |
| Klhl11         | -0.3964 | 1.83E-04 | 0.04079 | DOWN |
| Kcnj10         | -0.4117 | 4.85E-04 | 0.04780 | DOWN |
| Myrf           | -0.4187 | 1.63E-05 | 0.02360 | DOWN |
| Gjc3           | -0.4236 | 5.06E-04 | 0.04876 | DOWN |
| Adamts4        | -0.4298 | 2.02E-04 | 0.04263 | DOWN |
| Nap1l5         | -0.4403 | 1.91E-04 | 0.04177 | DOWN |
| Cachd1         | -0.4499 | 1.77E-04 | 0.04000 | DOWN |
| Nwd2           | -0.4529 | 4.41E-05 | 0.03348 | DOWN |
| Impact         | -0.4788 | 1.31E-04 | 0.03934 | DOWN |
| Nab2           | -0.4795 | 3.96E-04 | 0.04689 | DOWN |
| Pcdh17         | -0.4825 | 2.15E-05 | 0.02360 | DOWN |
| Pcdh10         | -0.4826 | 1.13E-04 | 0.03818 | DOWN |
| Rasal1         | -0.4869 | 2.12E-05 | 0.02360 | DOWN |
| <b>Ntng1</b>   | -0.4990 | 9.93E-06 | 0.02360 | DOWN |
| Zfp365         | -0.5023 | 3.35E-04 | 0.04640 | DOWN |

|                 |         |          |         |      |
|-----------------|---------|----------|---------|------|
| Plekhh1         | -0.5201 | 1.75E-04 | 0.04000 | DOWN |
| Sox2ot          | -0.5278 | 1.15E-04 | 0.03818 | DOWN |
| Fgfrl1          | -0.5284 | 3.77E-04 | 0.04689 | DOWN |
| Adgra1          | -0.5350 | 4.94E-04 | 0.04849 | DOWN |
| Cx3cl1          | -0.5381 | 3.43E-04 | 0.04651 | DOWN |
| Ugt8a           | -0.5472 | 7.33E-05 | 0.03612 | DOWN |
| Atp10b          | -0.5544 | 1.60E-04 | 0.03986 | DOWN |
| Gpr37           | -0.5603 | 1.65E-04 | 0.03986 | DOWN |
| Ermn            | -0.5673 | 8.63E-05 | 0.03612 | DOWN |
| Plp1            | -0.5684 | 4.31E-04 | 0.04744 | DOWN |
| Shroom2         | -0.5714 | 5.37E-04 | 0.04942 | DOWN |
| Gfra1           | -0.6082 | 2.60E-04 | 0.04640 | DOWN |
| Rasgrf1         | -0.6121 | 1.78E-05 | 0.02360 | DOWN |
| <b>Ncam2</b>    | -0.6251 | 4.59E-06 | 0.01884 | DOWN |
| Hap1            | -0.6305 | 4.05E-04 | 0.04715 | DOWN |
| Pabpc1l2b-ps    | -0.6715 | 1.23E-04 | 0.03852 | DOWN |
| Tmem132b        | -0.6859 | 4.74E-04 | 0.04744 | DOWN |
| Peg10           | -0.7091 | 4.68E-04 | 0.04744 | DOWN |
| Pex5l           | -0.7278 | 1.60E-04 | 0.03986 | DOWN |
| Plcxdl          | -0.7387 | 3.30E-04 | 0.04640 | DOWN |
| Vstm2a          | -0.7398 | 3.11E-04 | 0.04640 | DOWN |
| Casr            | -0.9043 | 3.63E-05 | 0.02861 | DOWN |
| Gpr165          | -0.9428 | 3.19E-04 | 0.04640 | DOWN |
| St8sia6         | -0.9644 | 2.13E-04 | 0.04335 | DOWN |
| Slc6a11         | -1.0963 | 1.34E-04 | 0.03934 | DOWN |
| Smim17          | -1.1013 | 7.32E-05 | 0.03612 | DOWN |
| Zkscan16        | -1.1840 | 5.54E-05 | 0.03612 | DOWN |
| Col24a1         | -1.1873 | 3.37E-04 | 0.04640 | DOWN |
| Mid1            | -1.3664 | 8.34E-05 | 0.03612 | DOWN |
| Cckbr           | -1.3983 | 2.36E-04 | 0.04609 | DOWN |
| Cdhr1           | -1.4899 | 5.11E-04 | 0.04876 | DOWN |
| Pde11a          | -1.6250 | 3.14E-04 | 0.04640 | DOWN |
| Kcnc2           | -1.6576 | 1.49E-04 | 0.03986 | DOWN |
| Stk32b          | -1.7024 | 3.78E-04 | 0.04689 | DOWN |
| Rasgrf2         | -1.8574 | 1.76E-04 | 0.04000 | DOWN |
| Asic4           | -2.0090 | 1.48E-04 | 0.03986 | DOWN |
| <b>Mid1-ps1</b> | -2.1407 | 5.39E-05 | 0.03612 | DOWN |
| Slit1           | -2.1595 | 3.03E-04 | 0.04640 | DOWN |
| Pax7            | -2.2033 | 8.07E-05 | 0.03612 | DOWN |
| Tacr3           | -2.2342 | 5.26E-04 | 0.04938 | DOWN |
| Fndc9           | -2.2579 | 2.09E-04 | 0.04335 | DOWN |

**Supplementary Table S3.** The genes significantly regulated in Homo PKC $\gamma$ -A24E mice related to developmental neural cells with IPA analysis.

| Genes   | FDR p-value |
|---------|-------------|
| Kcnj10  | 0.000485    |
| Ptprz1  | 0.00048     |
| Zeb2    | 0.00047     |
| Hipk2   | 0.000437    |
| Plp1    | 0.000431    |
| Nfia    | 0.000411    |
| Ret     | 0.00041     |
| Sparcl1 | 0.000397    |
| Prkg1   | 0.00037     |
| Cx3cl1  | 0.000343    |
| Znf365  | 0.000335    |
| Igsf9   | 0.000331    |
| Dgkg    | 0.000319    |
| Gabrb2  | 0.000314    |
| Slit1   | 0.000303    |
| Tspan2  | 0.000274    |
| Zbtb18  | 0.000264    |
| Fgfr3   | 0.000263    |
| Alcam   | 0.000251    |
| Cntnap2 | 0.000239    |
| Adamts4 | 0.000202    |
| Slitrk4 | 0.000167    |
| Gpr37   | 0.000165    |
| Nfatc4  | 0.000159    |
| Adgrl3  | 0.000158    |
| Raph1   | 0.000138    |
| Otx2    | 0.000106    |
| Mid1    | 0.0000834   |
| Utrn    | 0.0000749   |
| Ugt8    | 0.0000733   |
| Dock10  | 0.000033    |
| Prex2   | 0.0000319   |
| Id2     | 0.00003     |
| Rasgrf1 | 0.0000178   |
| Myrf    | 0.0000163   |
| Tppp    | 0.0000107   |
| Ntng1   | 0.00000993  |
| Ncam2   | 0.00000459  |
| Cpeb3   | 0.00000371  |
